# Supplementary material for: Integrated Metabolomic and Transcriptomic Profiles Provide Insights into the Mechanisms of Anthocyanin and Carotenoid Biosynthesis in Petals of Medicago sativa ssp. sativa and Medicago sativa ssp. falcata
Source: MDPI journal article supplement (doi:10.3390/plants13050700), 2024-02-29
Supplement: s1 [file s1]

## Supplemental Figures

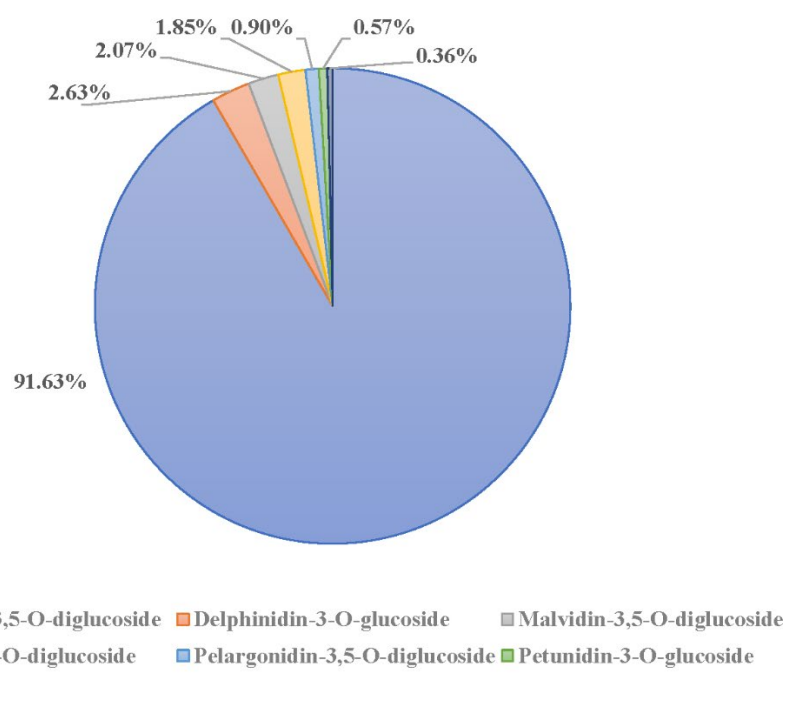

**Supplemental Figure S1: The proportion of anthocyanins in the purple flowers.**

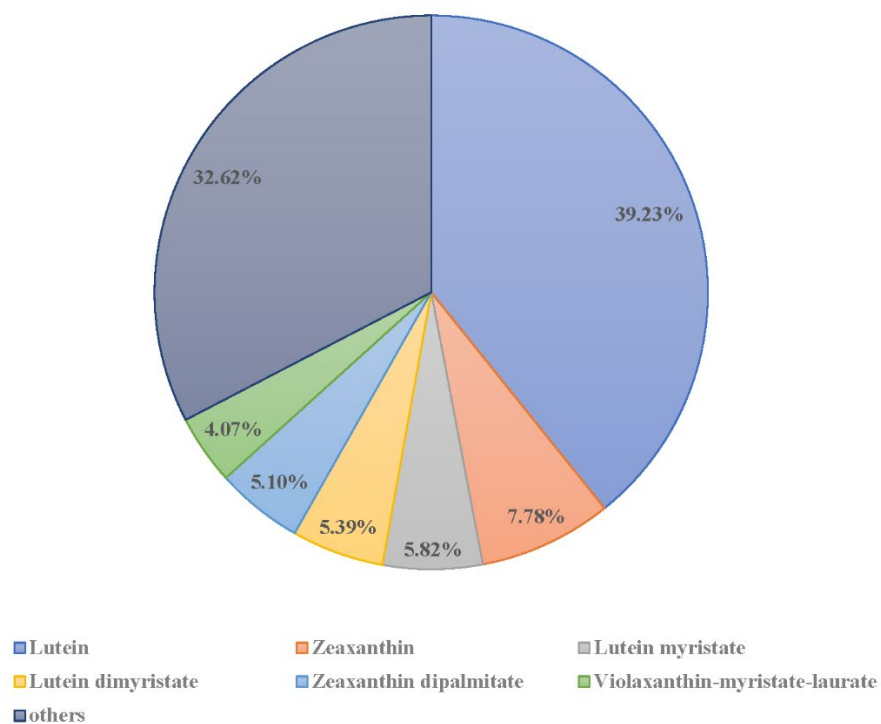

**Supplemental Figure S2: The proportion of carotenoids in the yellow flowers.**

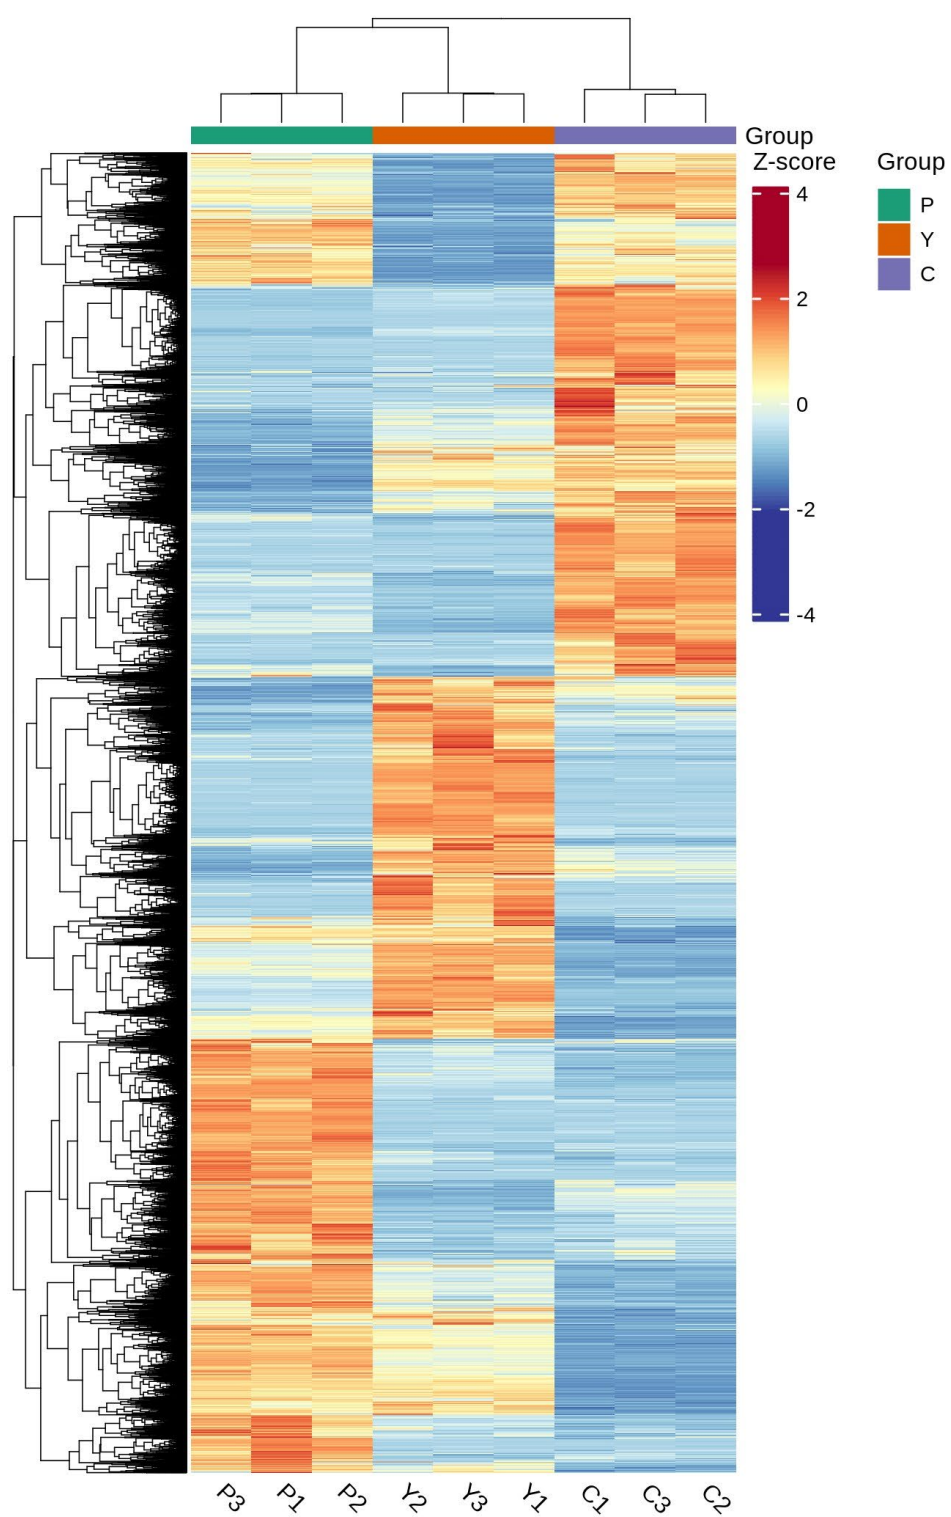

**Supplemental Figure S3: Hierarchical clustering of DEGs in three petals. A low to high expression is suggested by color changes (blue to red).**

A

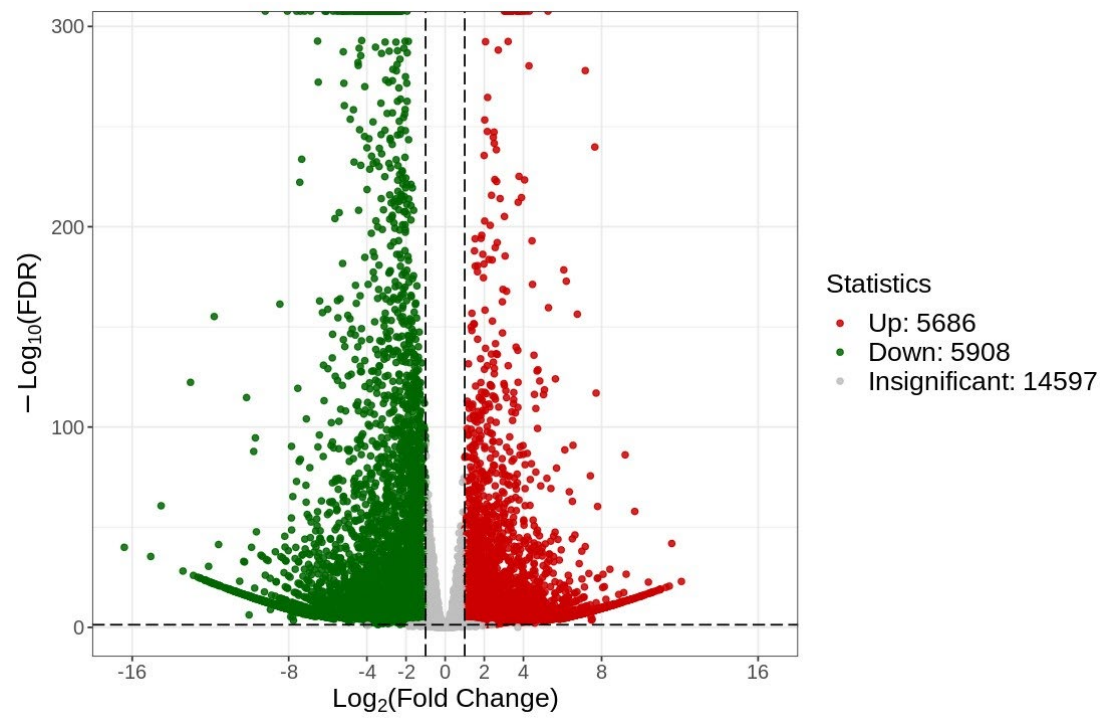

B

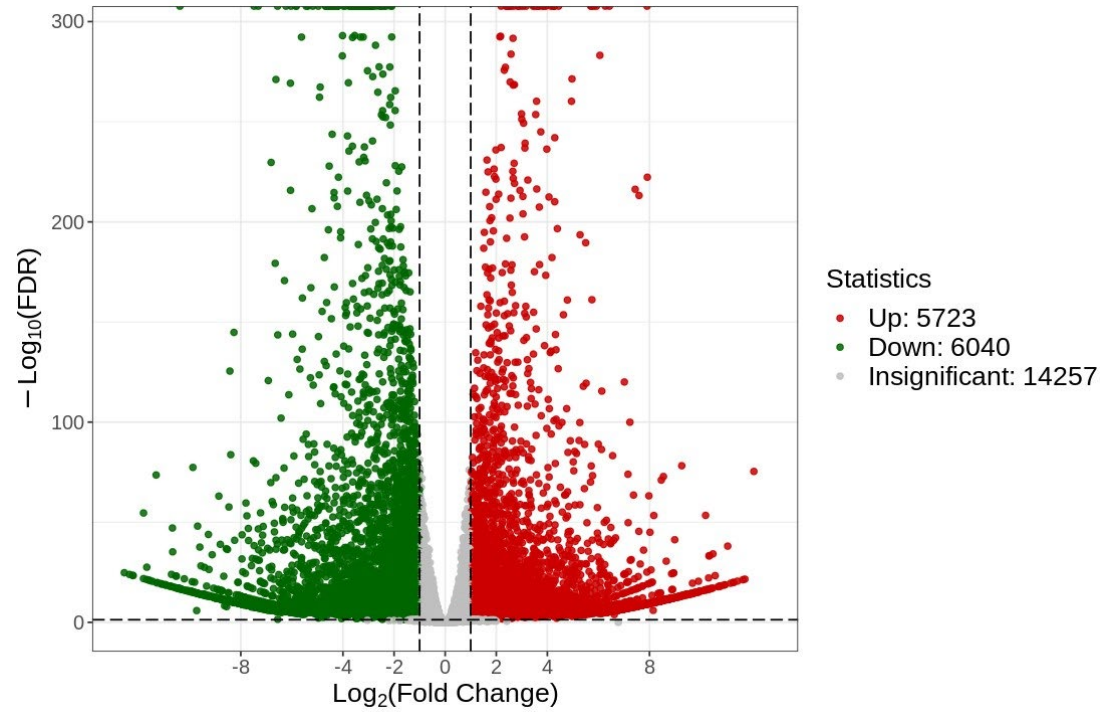

C

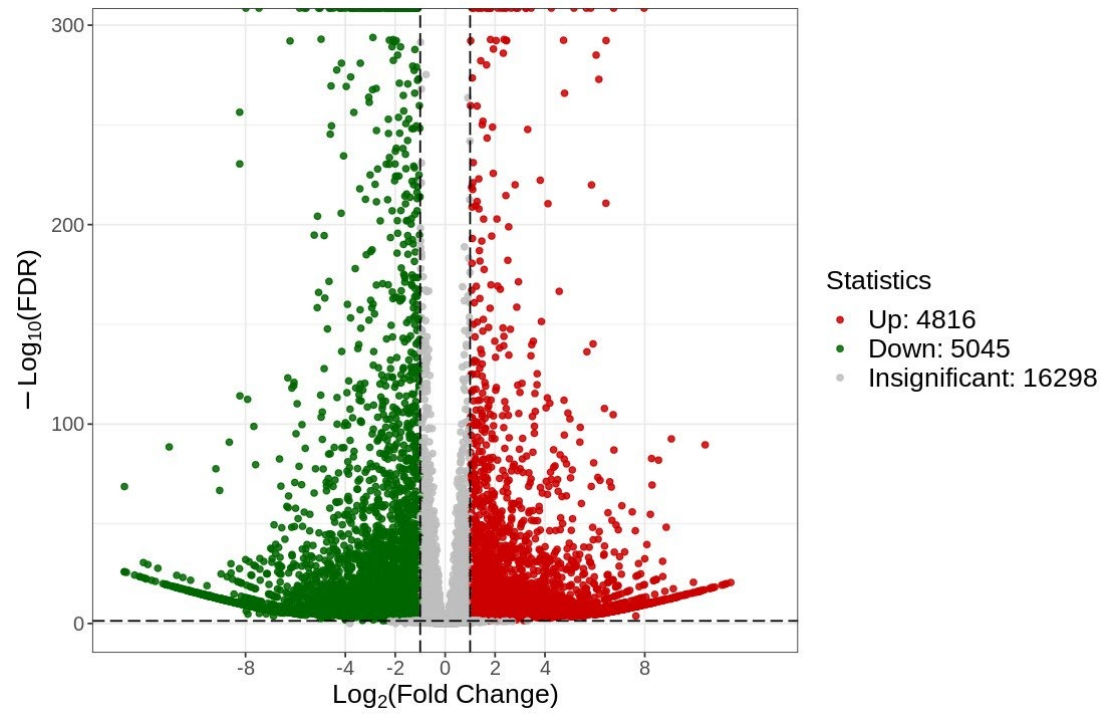

**Supplemental Figure S4: Volcano maps in (A) P vs C, (B) Y vs C and (C) P vs Y**

A

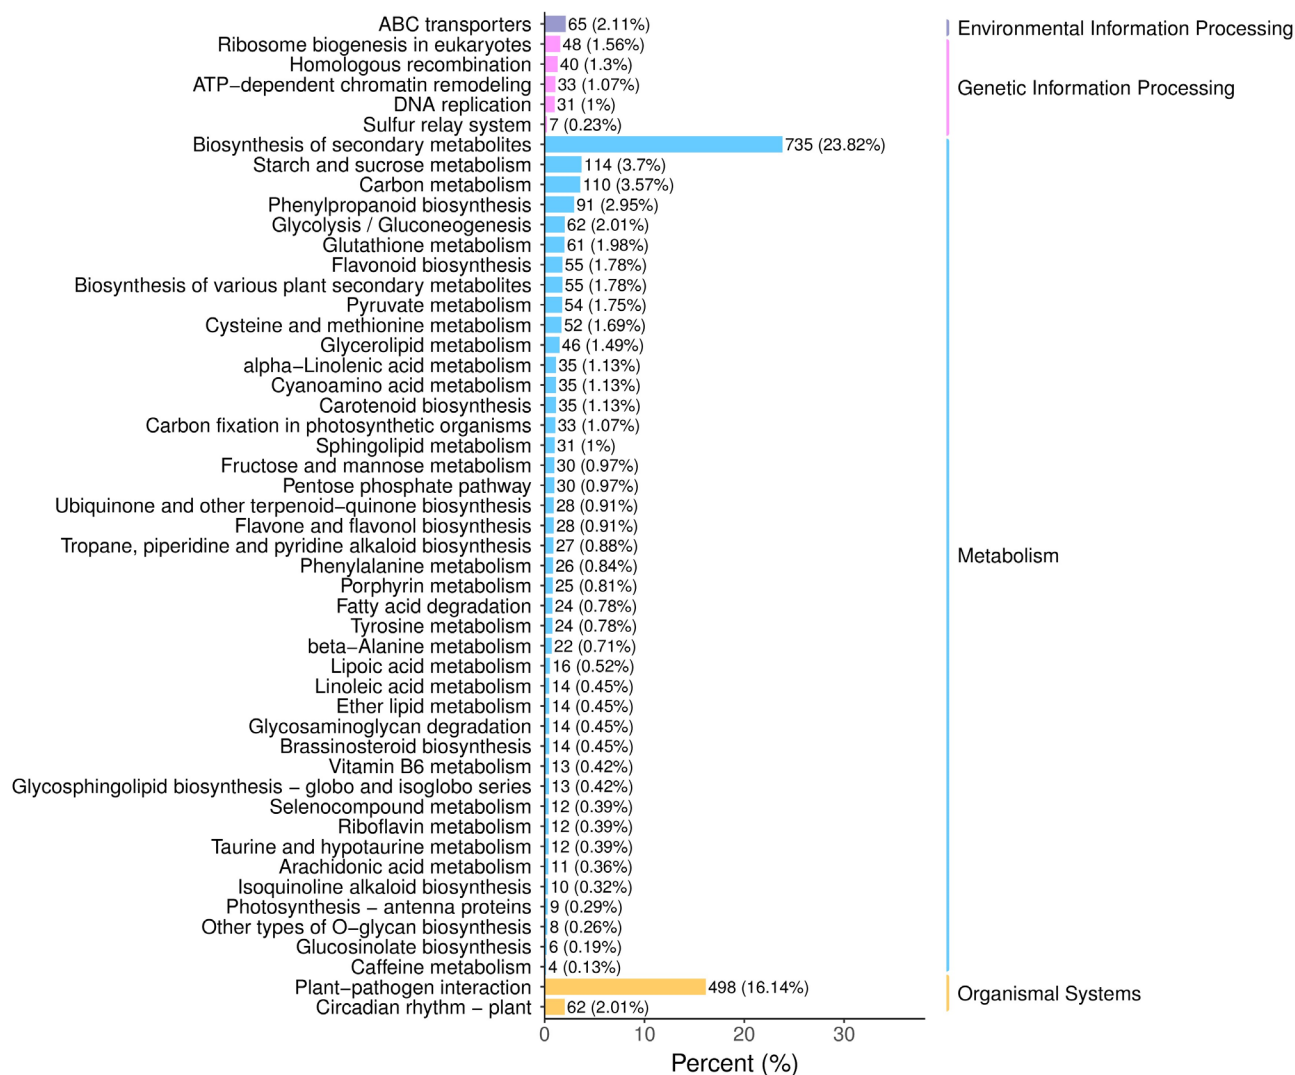

B

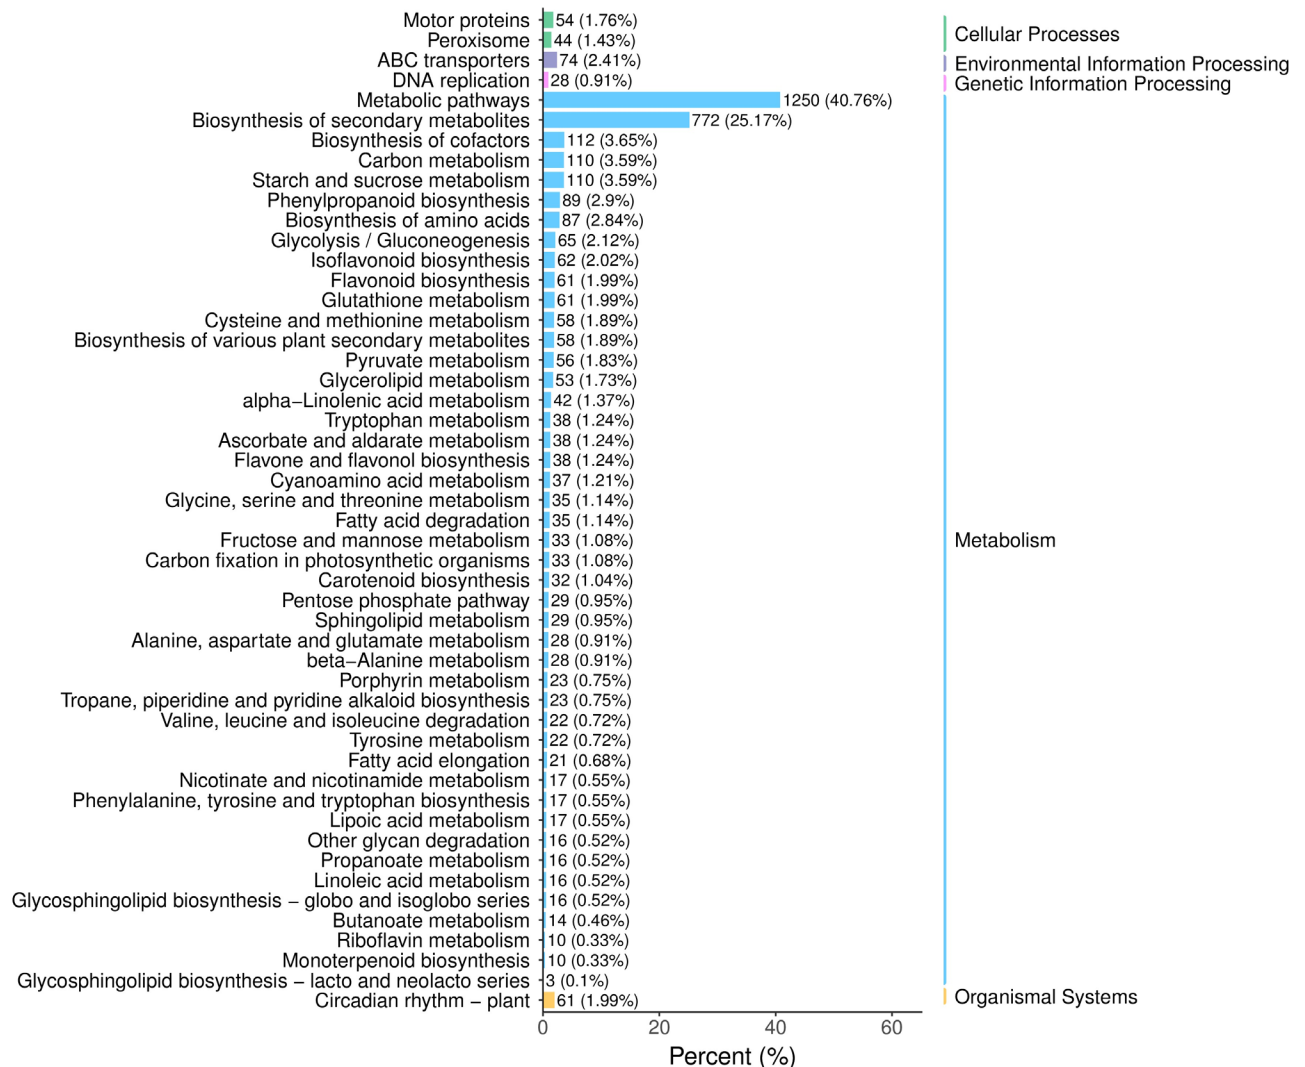

Supplemental Figure S5: KEGG enrichment map in (A) P vs C and (B) Y vs C.

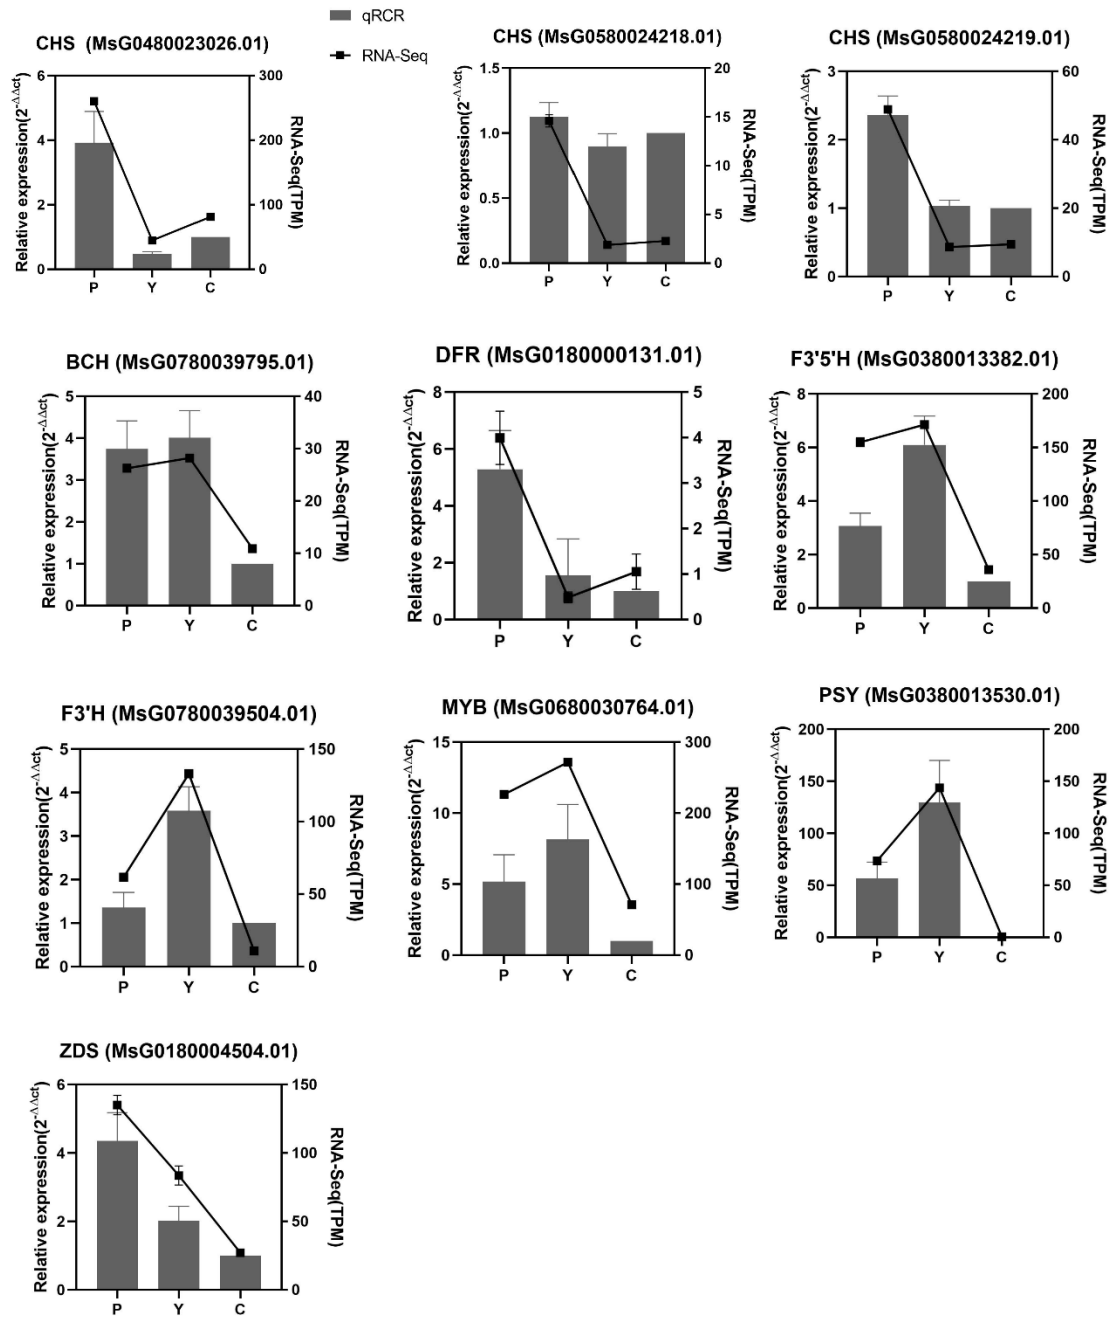

**Supplemental Figure S6: Verification of ten DEGs by qRT-PCR. Data are the means of three replicates.**
