# Supplementary material for: Integrated Metabolomic and Transcriptomic Profiles Provide Insights into the Mechanisms of Anthocyanin and Carotenoid Biosynthesis in Petals of Medicago sativa ssp. sativa and Medicago sativa ssp. falcata
Source: Plants (Basel). 2024 Feb 29;13(5):700. doi: 10.3390/plants13050700 (PMC10934425; doi:10.3390/plants13050700)
Supplement: Supplementary file 1 [file plants-13-00700-s001.zip › Supplemental Tables.xlsx]

## Sheet: Table S1
Compounds	P	Y	C
Delphinidin-3,5-O-diglucoside	5186.38	27.2246	14.9917
Delphinidin-3-O-glucoside	148.641	2.73781	0.825294
Malvidin-3,5-O-diglucoside	117.03	1.74561	1.42451
Cyanidin-3,5-O-diglucoside	104.709	0.349162	4.3767
Pelargonidin-3,5-O-diglucoside	50.9323	0.0363518	0.325892
Petunidin-3-O-glucoside	32.2347	0	0
Cyanidin-3-(6-O-p-caffeoyl)-glucoside	4.68802	1.6284	1.55287
Peonidin-3,5-O-diglucoside	3.90595	0.104682	0.493251
Cyanidin-3-O-(6-O-p-coumaroyl)-glucoside	2.53711	0.259215	1.07598
Petunidin-3-O-(6-O-malonyl-beta-D-glucoside)	1.92037	2.18181	0.419569
Cyanidin-3-O-(6-O-malonyl-beta-D-glucoside)	1.65625	0.994399	0.160357
Malvidin-3-O-glucoside	1.36698	0.0233405	0.0419045
Cyanidin-3-O-glucoside	1.35587	0	0
Pelargonidin-3-O-glucoside	0.679129	0.00605643	0.0419075
Cyanidin-3-O-sambubioside	0.603539	0.808693	1.5899
Malvidin-3-O-galactoside	0.274133	0.00564278	0.0162495
Cyanidin-3-O-5-O-(6-O-coumaroyl)-diglucoside	0.262111	0	0
Petunidin-3-O-sambubioside-5-O-glucoside	0.252754	0.0243823	0.0533017
Delphinidin-3-O-(6-O-p-coumaroyl)-glucoside	0.198128	0.0470187	0.0408666
Cyanidin-3-O-sophoroside	0.179598	0.330058	0.38443
Peonidin-3-O-glucoside	0.165727	0.000291113	0.0310396
Peonidin-3-O-(6-O-p-coumaroyl)-glucoside	0.105712	0.0202895	0.0214993
Cyanidin-3-(6''-caffeylsophoroside)-5-glucoside	0.0512287	0.0111978	0.011181
Delphinidin-3-O-(6-O-malonyl)-glucoside-3'-glucoside	0.0465101	0.0844075	0.0149367
Peonidin	0.0459747	0.130218	0.0520847
Peonidin-3-O-sophoroside	0.038475	0.00629466	0.0224077
Petunidin-3-O-arabinoside	0.0221337	0.0465327	0.0395282
Peonidin-3-O-sambubioside	0.0218604	0.0371768	0.0703524
Petunidin-3-O-rutinoside	0.0192646	0	0
Malvidin	0.0187303	0.0783536	0.0247355
Delphinidin-3-O-(6-O-acetyl)-glucoside	0.017085	0.102921	0.0184307
Pelargonidin-3-O-sambubioside-5-O-glucoside	0.0158171	0	0.00292491
Pelargonidin-3-O-sophoroside	0.0148335	0.00741027	0.00878124
Peonidin-3-O-(6-O-malonyl-beta-D-glucoside)	0.0138274	0.0120422	0
Delphinidin-3-O-5-O-(6-O-coumaroyl)-diglucoside	0.00929676	0	0.0116884
Pelargonidin-3-O-(6''-ferulylsambubioside)-5-O-(malonyl)-glucoside	0.00899356	0.00280176	0.00696631
Malvidin-3-O-arabinoside	0.00801083	0.00226087	0.001134
Cyanidin-3-O-(6''-ferulylsophoroside)-5-glucoside	0.00757582	0.00299259	0
Pelargonidin-3-O-sambubioside	0.00695091	0	0.00730195
Pelargonidin-3-O-[2-O-glucosyl-6-O-p-coumaroyl-glucoside]-5-O-glucoside	0.00560371	0.00273337	0.0106269
Pelargonidin-3-O-5-O-(6-O-coumaroyl)-diglucoside	0.00457575	0	0.00426206
Malvidin-3-O-rutinoside	0.00311254	0	0.00585235
Malvidin-3-O-5-O-(6-O-coumaroyl)-diglucoside	0.00306993	0	0
Petunidin-3-O-sophoroside	0	0.361327	0
Delphinidin-3-O-sambubioside-5-O-glucoside	0	0.0131089	0.0115268
Delphinidin-3-O-sambubioside	0	0.00970567	0.0151846
Delphinidin-3-O-rutinoside	0	0.00776366	0.00311168
Cyanidin-3-O-xyloside	0	0.00568206	0.00427376
Pelargonidin-3-O-(6-O-malonyl-beta-D-glucoside)	0	0.00487242	0
Pelargonidin-3-O-rutinoside-5-O-glucoside	0	0.00297116	0
Peonidin-3-O-5-O-(6-O-coumaroyl)-diglucoside	0	0.00295986	0
Delphinidin-3-O-arabinoside	0	0	0.0138162

## Sheet: Table S2
Compounds	Class	P	C	P_vs_C_Log2FC
Delphinidin-3,5-O-diglucoside	Delphinidin	5186.38	14.9917	8.43442
Delphinidin-3-O-glucoside	Delphinidin	148.641	0.825294	7.49271
Malvidin-3,5-O-diglucoside	Malvidin	117.03	1.42451	6.36027
Cyanidin-3,5-O-diglucoside	Cyanidin	104.709	4.3767	4.5804
Pelargonidin-3,5-O-diglucoside	Pelargonidin	50.9323	0.325892	7.28804
Petunidin-3-O-glucoside	Petunidin	32.2347	0	inf
Cyanidin-3-(6-O-p-caffeoyl)-glucoside	Cyanidin	4.68802	1.55287	1.59405
Peonidin-3,5-O-diglucoside	Peonidin	3.90595	0.493251	2.98528
Cyanidin-3-O-(6-O-p-coumaroyl)-glucoside	Cyanidin	2.53711	1.07598	1.23754
Petunidin-3-O-(6-O-malonyl-beta-D-glucoside)	Petunidin	1.92037	0.419569	2.1944
Cyanidin-3-O-(6-O-malonyl-beta-D-glucoside)	Cyanidin	1.65625	0.160357	3.36857
Malvidin-3-O-glucoside	Malvidin	1.36698	0.0419045	5.02775
Cyanidin-3-O-glucoside	Cyanidin	1.35587	0	inf
Pelargonidin-3-O-glucoside	Pelargonidin	0.679129	0.0419075	4.01841
Cyanidin-3-O-sambubioside	Cyanidin	0.603539	1.5899	-1.39742
Malvidin-3-O-galactoside	Malvidin	0.274133	0.0162495	4.07641
Cyanidin-3-O-5-O-(6-O-coumaroyl)-diglucoside	Cyanidin	0.262111	0	inf
Petunidin-3-O-sambubioside-5-O-glucoside	Petunidin	0.252754	0.0533017	2.24548
Delphinidin-3-O-(6-O-p-coumaroyl)-glucoside	Delphinidin	0.198128	0.0408666	2.27744
Cyanidin-3-O-sophoroside	Cyanidin	0.179598	0.38443	-1.09795
Peonidin-3-O-glucoside	Peonidin	0.165727	0.0310396	2.41662
Peonidin-3-O-(6-O-p-coumaroyl)-glucoside	Peonidin	0.105712	0.0214993	2.29777
Cyanidin-3-(6''-caffeylsophoroside)-5-glucoside	Cyanidin	0.0512287	0.011181	2.19591
Delphinidin-3-O-(6-O-malonyl)-glucoside-3'-glucoside	Delphinidin	0.0465101	0.0149367	1.63868
Peonidin-3-O-sambubioside	Peonidin	0.0218604	0.0703524	-1.68628
Petunidin-3-O-rutinoside	Petunidin	0.0192646	0	inf
Pelargonidin-3-O-sambubioside-5-O-glucoside	Pelargonidin	0.0158171	0.00292491	2.43502
Peonidin-3-O-(6-O-malonyl-beta-D-glucoside)	Peonidin	0.0138274	0	inf
Malvidin-3-O-arabinoside	Malvidin	0.00801083	0.001134	2.82053
Cyanidin-3-O-(6''-ferulylsophoroside)-5-glucoside	Cyanidin	0.00757582	0	inf
Malvidin-3-O-5-O-(6-O-coumaroyl)-diglucoside	Malvidin	0.00306993	0	inf
Procyanidin A1	Procyanidin	0.000616691	0	inf
Cyanidin-3-O-xyloside	Cyanidin	0	0.00427376	-inf
Delphinidin-3-O-sambubioside-5-O-glucoside	Delphinidin	0	0.0115268	-inf
Delphinidin-3-O-arabinoside	Delphinidin	0	0.0138162	-inf
Delphinidin-3-O-rutinoside	Delphinidin	0	0.00311168	-inf
Delphinidin-3-O-sambubioside	Delphinidin	0	0.0151846	-inf
Kaempferol-3-O-rutinoside	flavonoid	31.4383	13.4951	1.22009
Rutin	flavonoid	1.81902	0.455208	1.99857
Dihydrokaempferol	flavonoid	32.6324	8.31201	1.97304
Afzelin	flavonoid	12.2363	3.57239	1.7762
Naringenin-7-O-glucoside	flavonoid	3.70366	13.5331	-1.86947

## Sheet: Table S3
Compounds	P	Y	C
lutein	13.8656	60.7639	14.7717
zeaxanthin	3.00933	12.0568	8.91543
lutein myristate	0.230676	9.00773	0.467727
lutein dimyristate	0.151499	8.34937	0.236226
zeaxanthin dipalmitate	0.283845	7.89316	0.307811
violaxanthin-myristate-laurate	0.81472	6.30532	1.18207
lutein palmitate	0.323492	5.44436	0.444439
violaxanthin dilaurate	2.41272	5.37996	2.25651
lutein dilaurate	0.281597	5.15084	0.232503
(E/Z)-phytoene	0.800332	4.34711	1.27779
violaxanthin palmitate	0.174616	4.00157	0.146807
violaxanthin myristate	0.548298	3.94619	0.644553
antheraxanthin	1.25113	3.66849	1.68666
β-carotene	2.19197	3.58364	1.61854
violaxanthin	1.38608	3.52771	0.969338
lutein dipalmitate	0	3.23001	0.0681148
neoxanthin	1.10295	2.54178	1.05441
β-cryptoxanthin	0.317413	1.17985	0.368483
violaxanthin dimyristate	0.247089	0.84179	0.518191
violaxanthin-myristate-palmitate	0	0.691582	0
violaxanthin laurate	0.0856632	0.589023	0.0283274
neochrome palmitate	0.103359	0.458155	0.145535
α-carotene	0.152349	0.318097	0.145553
rubixanthin palmitate	0.154927	0.25535	0.0742163
lutein caprate	0.0187157	0.195662	0.016162
β-cryptoxanthin palmitate	0.0933228	0.192722	0.0460743
5,6epoxy-luttein dilaurate	0.0046258	0.18315	0.00873097
zeaxanthin palmitate	0.00554981	0.163052	0.0133131
lutein dioleate	0.0182616	0.125995	0.00435332
lutein oleate	0.0115961	0.122579	0.0134543
zeaxanthin-laurate-myristate	0.0196651	0.117783	0
α-cryptoxanthin	0.0379184	0.10542	0.0301728
capsorubin	0.153947	0.0873221	0.0749819
zeaxanthin dilaurate	0	0.0446106	0.00900591
zeaxanthin-caprate-laurate	0.0221884	0.0137039	0
β-cryptoxanthin oleate	0.0349128	0.0136584	0.0114786
β-citraurin	0	0.00215827	0.00055901
γ-carotene	0.0235907	0	0
β-cryptoxanthin myristate	0.0590384	0	0.0478398
canthaxanthin	0.000227365	0	0.000122376
5,6epoxy-lutein-caprate-palmitate	0.0577702	0	0
lutein distearate	0.00802311	0	0
rubixanthin caprate	0	0	0.0051257
antheraxanthin dipalmitate	0	0	0.0136667
β-cryptoxanthin laurate	0.0192678	0	0.0160029

## Sheet: Table S4
Compounds	Class	Y	C	Y_vs_C_Log2FC
α-carotene	carotenes	0.318097	0.145553	1.12792
β-carotene	carotenes	3.58364	1.61854	1.14673
(E/Z)-phytoene	carotenes	4.34711	1.27779	1.7664
β-cryptoxanthin myristate	xanthophylls	0	0.0478398	-inf
zeaxanthin-caprate-laurate	xanthophylls	0.0137039	0	inf
zeaxanthin dilaurate	xanthophylls	0.0446106	0.00900591	2.30844
zeaxanthin-laurate-myristate	xanthophylls	0.117783	0	inf
canthaxanthin	xanthophylls	0	0.000122376	-inf
lutein dipalmitate	xanthophylls	3.23001	0.0681148	5.56743
rubixanthin caprate	xanthophylls	0	0.0051257	-inf
violaxanthin-myristate-palmitate	xanthophylls	0.691582	0	inf
antheraxanthin dipalmitate	xanthophylls	0	0.0136667	-inf
β-cryptoxanthin laurate	xanthophylls	0	0.0160029	-inf
β-citraurin	xanthophylls	0.00215827	0.00055901	1.94893
zeaxanthin palmitate	xanthophylls	0.163052	0.0133131	3.61441
lutein caprate	xanthophylls	0.195662	0.016162	3.59768
lutein myristate	xanthophylls	9.00773	0.467727	4.26742
lutein palmitate	xanthophylls	5.44436	0.444439	3.61471
lutein dimyristate	xanthophylls	8.34937	0.236226	5.14343
neochrome palmitate	xanthophylls	0.458155	0.145535	1.65447
violaxanthin laurate	xanthophylls	0.589023	0.0283274	4.37805
violaxanthin myristate	xanthophylls	3.94619	0.644553	2.61409
violaxanthin dilaurate	xanthophylls	5.37996	2.25651	1.2535
antheraxanthin	xanthophylls	3.66849	1.68666	1.12102
violaxanthin	xanthophylls	3.52771	0.969338	1.86366
neoxanthin	xanthophylls	2.54178	1.05441	1.2694
lutein	xanthophylls	60.7639	14.7717	2.04037
β-cryptoxanthin	xanthophylls	1.17985	0.368483	1.67894
α-cryptoxanthin	xanthophylls	0.10542	0.0301728	1.80482
lutein dilaurate	xanthophylls	5.15084	0.232503	4.46948
rubixanthin palmitate	xanthophylls	0.25535	0.0742163	1.78267
violaxanthin palmitate	xanthophylls	4.00157	0.146807	4.76858
violaxanthin-myristate-laurate	xanthophylls	6.30532	1.18207	2.41526
zeaxanthin dipalmitate	xanthophylls	7.89316	0.307811	4.68049
β-cryptoxanthin palmitate	xanthophylls	0.192722	0.0460743	2.06449
lutein oleate	xanthophylls	0.122579	0.0134543	3.18758
5,6epoxy-luttein dilaurate	xanthophylls	0.18315	0.00873097	4.39074
lutein dioleate	xanthophylls	0.125995	0.00435332	4.8551

## Sheet: Table S5
Sample	Raw Reads	Clean Reads	Q30(%)	GC Content(%)	Reads mapped
P1	46350900	45160744	92.69	41.33	35975720(79.66%)
P2	46918312	45616764	92.87	41.33	36270592(79.51%)
P3	45691168	44390924	92.74	41.44	35414502(79.78%)
Y1	45005084	43653048	92.66	41.27	33590240(76.95%)
Y2	42207694	40928998	91.96	41.3	31340881(76.57%)
Y3	45415832	43890208	91.72	41.25	33532419(76.40%)
C1	47772800	46683232	92.86	41.48	35587928(76.23%)
C2	46182708	45290714	92.39	41.75	33406761(73.76%)
C3	47330900	46426264	92.41	41.86	34208589(73.68%)

## Sheet: Table S6
Gene ID	Sequence (5'-3')
MsG0380015289.01 F	CCGATCAAGCTCCTCCATCA
MsG0380015289.01 R	ACGGGAAGATCTCACGCAC
MsG0480023026.01 F	TGCTGGTGGTACGGTTCTTC
MsG0480023026.01 R	GTGTCACTAGGCCCACGAAA
MsG0580024219.01 F	AAAGGTGCTCGTGTGTTGGT
MsG0580024219.01 R	TCCCTCACTGTCTGGAGCAA
MsG0580024218.01 F	GCAGGACATGGTGGTGGTAG
MsG0580024218.01 R	TTGATTTTGGTTGGCCCCAT
MsG0780039504.01 F	TATACCTTTTGGGGCAGGCAA
MsG0780039504.01 R	AAAGTGCGTAGAAGGGATGC
MsG0180000131.01 F	TTCGGGTTTCATCGGGTCAT
MsG0180000131.01 R	GTTTGCTCTTTGCACCTGGC
MsG0380013382.01 F	GTAAACAACGACGGCTCCAA
MsG0380013382.01 R	CGTGGCAAGTTTAGTGGTGTT
MsG0180004504.01 F	TCCAGATGGTGCATTGAGGG
MsG0180004504.01 R	AAACCCAAGGGCATAGGCAA
MsG0380013530.01 F	GCCATTTACGTGTGGTGCAG
MsG0380013530.01 R	GGCCTTTGGTGTGATGTGTG
MsG0780039795.01 F	TCATCTCCTGACGCCAACAA
MsG0780039795.01 R	CATATCCCCGCGTCAAAGGA
MsG0680030764.01 F	AGCTATGGCAGCCCATCTGT
MsG0680030764.01 R	GGTCCTGGAAATTGGAAAGCTG
